# Supplementary material for: Estimation of time course in phytochrome photostationary state under artificial light for controlling plant growth
Source: Frontiers journal article supplement (doi:10.3389/fpls.2023.1305182), 2024-01-24
Supplement: Data_Sheet_1.zip [file PSS Calculator.xlsx]

## Sheet: Calculations
				Weighted average cross section [ m2 mol–1 ]									wave length	cross section
wave length	Spectral photon flux density			σr	σfr									σr	σfr				Relative time (1~100)	Time	Instanteneous PSS
[ nm ]	[ µmol m–2 s–1 nm-1]			[ m2 mol–1 ]	[ m2 mol–1 ]								[ nm ]	[ m2 mol–1 ]	[ m2 mol–1 ]					[s]
350				446.081	91.413			Steady-state PSS value	0.829927				350	1048	261	0	0		0	0	0.69
351													351			0	0		1	6	0.69874
352													352	1124	271	0	0		2	12	0.706935	a	b
353		Initial PSS value	0.69										353			0	0		3	18	0.714617	0.00892162	0.00182826
354		PFD	20										354	1190	274	0	0		4	24	0.72182
355		Time scale [s]	600										355			0	0		5	30	0.728573
356		x [%]	50					Time required for PSS change to be x % complete [s]	64.4795				356	1263	282	0	0		6	36	0.734904
357													357			0	0		7	42	0.740839
358		y [s]	120					PSS value after y seconds	0.791409				358	1326	291	0	0		8	48	0.746404
359													359			0	0		9	54	0.751621
360													360	1389	301	0	0		10	60	0.756512
361													361			0	0		11	66	0.761098
362													362	1436	312	0	0		12	72	0.765397
363													363			0	0		13	78	0.769428
364													364	1468	326	0	0		14	84	0.773207
365													365			0	0		15	90	0.77675
366													366	1484	335	0	0		16	96	0.780072
367													367			0	0		17	102	0.783186
368													368	1517	349	0	0		18	108	0.786105
369													369			0	0		19	114	0.788843
370													370	1529	365	0	0		20	120	0.791409
371													371			0	0		21	126	0.793815
372													372	1540	381	0	0		22	132	0.796071
373													373			0	0		23	138	0.798185
374													374	1545	397	0	0		24	144	0.800168
375													375			0	0		25	150	0.802027
376													376	1577	411	0	0		26	156	0.80377
377													377			0	0		27	162	0.805404
378													378	1577	426	0	0		28	168	0.806935
379													379			0	0		29	174	0.808372
380													380	1586	442	0	0		30	180	0.809718
381	1.63171												381			0	0		31	186	0.81098
382	1.58771												382	1572	451	2495.88	716.057		32	192	0.812164
383	1.64319												383			0	0		33	198	0.813273
384	1.78785												384	1557	464	2783.68	829.562		34	204	0.814314
385	2.53665												385			0	0		35	210	0.815289
386	2.50657												386	1505	485	3772.39	1215.69		36	216	0.816203
387	2.60917												387			0	0		37	222	0.817061
388	2.75029												388	1464	496	4026.42	1364.14		38	228	0.817864
389	2.79762												389			0	0		39	234	0.818618
390	2.81957												390	1381	511	3893.83	1440.8		40	240	0.819324
391	2.84236												391			0	0		41	246	0.819987
392	2.79446												392	1294	524	3616.03	1464.3		42	252	0.820608
393	2.65226												393			0	0		43	258	0.82119
394	2.48425												394	1215	534	3018.36	1326.59		44	264	0.821735
395	2.4052												395			0	0		45	270	0.822247
396	2.60849												396	1097	540	2861.51	1408.58		46	276	0.822727
397	3.20641												397			0	0		47	282	0.823177
398	4.44467												398	1004	553	4462.45	2457.9		48	288	0.823598
399	6.5267												399			0	0		49	294	0.823994
400	9.3407												400	904	559	8443.99	5221.45		50	300	0.824364
401	12.467												401			0	0		51	306	0.824712
402	15.7218												402	810	563	12734.7	8851.37		52	312	0.825038
403	19.1641												403			0	0		53	318	0.825343
404	22.5049												404	733	568	16496.1	12782.8		54	324	0.825629
405	25.4244												405			0	0		55	330	0.825898
406	27.7047												406	668	571	18506.7	15819.4		56	336	0.82615
407	29.3346												407			0	0		57	342	0.826386
408	30.3698												408	604	573	18343.4	17401.9		58	348	0.826607
409	30.5277												409			0	0		59	354	0.826814
410	29.7559												410	561	570	16693.1	16960.9		60	360	0.827009
411	28.3507												411			0	0		61	366	0.827191
412	26.6588												412	519	564	13835.9	15035.6		62	372	0.827362
413	24.8541												413			0	0		63	378	0.827522
414	23.0038												414	471	557	10834.8	12813.1		64	384	0.827672
415	21.451												415			0	0		65	390	0.827813
416	20.5981												416	427	543	8795.39	11184.8		66	396	0.827945
417	20.4758												417			0	0		67	402	0.828069
418	20.8347												418	408	528	8500.56	11000.7		68	408	0.828185
419	21.7259												419			0	0		69	414	0.828294
420	23.0471												420	366	507	8435.24	11684.9		70	420	0.828396
421	24.6178												421			0	0		71	426	0.828492
422	26.4513												422	348	489	9205.05	12934.7		72	432	0.828581
423	28.6052												423			0	0		73	438	0.828665
424	31.0054												424	320	454	9921.73	14076.5		74	444	0.828744
425	33.6539												425			0	0		75	450	0.828818
426	36.61												426	308	431	11275.9	15778.9		76	456	0.828887
427	40.726												427			0	0		77	462	0.828952
428	47.1012												428	292	401	13753.6	18887.6		78	468	0.829013
429	57.9918												429			0	0		79	474	0.82907
430	72.5835												430	274	377	19887.9	27364		80	480	0.829124
431	89.6662												431			0	0		81	486	0.829174
432	107.812												432	263	353	28354.6	38057.6		82	492	0.829221
433	126.299												433			0	0		83	498	0.829265
434	144.629												434	244	325	35289.5	47004.4		84	504	0.829307
435	161.315												435			0	0		85	510	0.829345
436	175.092												436	244	300	42722.4	52527.6		86	516	0.829382
437	185.75												437			0	0		87	522	0.829416
438	192.732												438	230	273	44328.4	52615.8		88	528	0.829448
439	195.873												439			0	0		89	534	0.829478
440	193.693												440	230	261	44549.4	50553.9		90	540	0.829506
441	187.021												441			0	0		91	546	0.829532
442	177.311												442	209	233	37058	41313.5		92	552	0.829557
443	166.147												443			0	0		93	558	0.82958
444	154.092												444	196	217	30202	33438		94	564	0.829602
445	141.622												445			0	0		95	570	0.829622
446	130.331												446	184	202	23980.9	26326.9		96	576	0.829641
447	121.32												447			0	0		97	582	0.829659
448	114.667												448	172	186	19722.7	21328.1		98	588	0.829676
449	110.014												449			0	0		99	594	0.829692
450	106.573												450	162	169	17264.8	18010.8		100	600	0.829706
451	103.787												451			0	0
452	101.757												452	162	155	16484.6	15772.3
453	100.119												453			0	0
454	98.6279												454	150	144	14794.2	14202.4
455	97.2511												455			0	0
456	95.9645												456	143	132	13722.9	12667.3
457	95.0092												457			0	0
458	94.4452												458	128	126	12089	11900.1
459	94.1679												459			0	0
460	93.9661												460	128	112	12027.7	10524.2
461	93.7588												461			0	0
462	93.3183												462	119	106	11104.9	9891.74
463	92.3731												463			0	0
464	91.1856												464	119	99.1	10851.1	9036.49
465	89.6218												465			0	0
466	87.7024												466	107	93.1	9384.16	8165.09
467	85.7186												467			0	0
468	83.3495												468	107	87.7	8918.4	7309.75
469	80.5486												469			0	0
470	77.6488												470	101	81.9	7842.53	6359.44
471	74.8674												471			0	0
472	72.2024												472	101	75.7	7292.44	5465.72
473	69.896												473			0	0
474	67.9003												474	92.9	72.2	6307.94	4902.4
475	66.3333												475			0	0
476	65.6399												476	92.9	71.8	6097.95	4712.94
477	66.3964												477			0	0
478	68.4383												478	84.6	62.5	5789.88	4277.39
479	72.2691												479			0	0
480	77.8347												480	84.6	57.8	6584.82	4498.85
481	84.862												481			0	0
482	93.3584												482	84.6	53.1	7898.12	4957.33
483	103.276												483			0	0
484	114.09												484	74.8	49.6	8533.93	5658.86
485	125.128												485			0	0
486	135.571												486	74.8	49.6	10140.7	6724.32
487	145.056												487			0	0
488	153.051												488	74.8	49.6	11448.2	7591.33
489	159.324												489			0	0
490	163.27												490	74.8	44.9	12212.6	7330.82
491	164.789												491			0	0
492	163.961												492	68.7	45.2	11264.1	7411.04
493	160.718												493			0	0
494	155.131												494	68.7	41.6	10657.5	6453.45
495	147.68												495			0	0
496	138.973												496	68.7	41.6	9547.45	5781.28
497	129.592												497			0	0
498	119.835												498	68.7	36.9	8232.66	4421.91
499	109.9												499			0	0
500	99.8808												500	68.7	36.9	6861.81	3685.6
501	90.0579												501			0	0
502	80.7296												502	77	36.5	6216.18	2946.63
503	71.9824												503			0	0
504	63.9419												504	77	37.6	4923.53	2404.22
505	56.7326												505			0	0
506	50.4635												506	77	32.9	3885.69	1660.25
507	45.0871												507			0	0
508	40.4466												508	77	32.9	3114.39	1330.69
509	36.5587												509			0	0
510	33.2971												510	77	32.9	2563.88	1095.47
511	30.607												511			0	0
512	28.3613												512	77	32.9	2183.82	933.087
513	26.5463												513			0	0
514	25.0625												514	88.4	33.3	2215.53	834.581
515	23.8468												515			0	0
516	22.755												516	93.7	27.3	2132.14	621.212
517	21.5842												517			0	0
518	20.4578												518	110	26.4	2250.36	540.086
519	19.4841												519			0	0
520	18.6256												520	110	26.4	2048.82	491.716
521	17.8335												521			0	0
522	17.1418												522	109	26.3	1868.46	450.829
523	16.5421												523			0	0
524	15.9744												524	122	30.9	1948.88	493.609
525	15.4802												525			0	0
526	15.0093												526	130	30.4	1951.21	456.283
527	14.8174												527			0	0
528	14.9567												528	130	30.4	1944.37	454.684
529	15.3125												529			0	0
530	16.1448												530	137	30	2211.84	484.344
531	17.6463												531			0	0
532	20.7304												532	153	29.2	3171.75	605.328
533	25.6446												533			0	0
534	35.2008												534	168	28.4	5913.73	999.703
535	50.2152												535			0	0
536	73.5142												536	168	28.4	12350.4	2087.8
537	104.967												537			0	0
538	144.768												538	186	32.9	26926.8	4762.87
539	191.826												539			0	0
540	245.628												540	202	32.1	49616.9	7884.66
541	300.306												541			0	0
542	354.728												542	221	33.3	78394.9	11812.4
543	405.252												543			0	0
544	450.118												544	239	32.3	107578	14538.8
545	484.823												545			0	0
546	508.709												546	252	35.2	128195	17906.6
547	519.087												547			0	0
548	516.416												548	270	34.3	139432	17713.1
549	500.432												549			0	0
550	473.091												550	304	39.3	143820	18592.5
551	435.297												551			0	0
552	393.195												552	311	39	122284	15334.6
553	348.22												553			0	0
554	303.435												554	343	37.3	104078	11318.1
555	260.852												555			0	0
556	222.321												556	369	43.9	82036.4	9759.89
557	188.232												557			0	0
558	158.419												558	403	42.1	63842.9	6669.44
559	132.651												559			0	0
560	111.061												560	421	45.8	46756.7	5086.59
561	93.0003												561			0	0
562	78.2819												562	435	45.1	34052.6	3530.51
563	66.4009												563			0	0
564	56.5735												564	468	49.9	26476.4	2823.02
565	48.5445												565			0	0
566	42.0666												566	504	55.6	21201.6	2338.9
567	36.985												567			0	0
568	32.7616												568	523	54.6	17134.3	1788.78
569	29.6593												569			0	0
570	27.7209												570	560	61.3	15523.7	1699.29
571	26.7935												571			0	0
572	26.7157												572	595	59.5	15895.8	1589.58
573	27.5766												573			0	0
574	29.4267												574	640	65.8	18833.1	1936.28
575	32.7673												575			0	0
576	37.5424												576	679	69.5	25491.3	2609.2
577	43.5058												577			0	0
578	50.8099												578	735	73.1	37345.3	3714.2
579	59.4766												579			0	0
580	68.9353												580	789	76.7	54390	5287.34
581	79.0707												581			0	0
582	90.0652												582	844	80.7	76015	7268.26
583	101.308												583			0	0
584	111.724												584	908	84.2	101445	9407.16
585	121.22												585			0	0
586	129.554												586	967	93	125279	12048.5
587	136.449												587			0	0
588	141.853												588	1052	95.1	149229	13490.2
589	144.818												589			0	0
590	145.545												590	1122	99.7	163301	14510.8
591	144.68												591			0	0
592	142.07												592	1201	110	170626	15627.7
593	137.357												593			0	0
594	131.301												594	1304	121	171217	15887.4
595	124.759												595			0	0
596	117.746												596	1381	124	162607	14600.5
597	110.273												597			0	0
598	102.753												598	1477	136	151766	13974.4
599	95.2628												599			0	0
600	88.6737												600	1576	146	139750	12946.4
601	82.9104												601			0	0
602	77.7171												602	1665	148	129399	11502.1
603	74.1105												603			0	0
604	72.5533												604	1745	157	126606	11390.9
605	76.7531												605			0	0
606	86.7703												606	1815	161	157488	13970
607	101.863												607			0	0
608	121.379												608	1894	171	229892	20755.8
609	144.346												609			0	0
610	169.001												610	1950	179	329552	30251.2
611	194.378												611			0	0
612	218.334												612	2015	192	439943	41920.1
613	240.324												613			0	0
614	258.631												614	2063	199	533556	51467.6
615	273.195												615			0	0
616	280.78												616	2104	212	590761	59525.4
617	281.712												617			0	0
618	277.052												618	2141	218	593168	60397.3
619	267.589												619			0	0
620	254.199												620	2184	232	555171	58974.2
621	238.59												621			0	0
622	221.759												622	2247	244	498292	54109.2
623	205.981												623			0	0
624	191.609												624	2303	257	441276	49243.5
625	179.287												625			0	0
626	168.917												626	2361	269	398813	45438.7
627	159.981												627			0	0
628	151.729												628	2454	282	372343	42787.6
629	143.723												629			0	0
630	136.032												630	2540	301	345521	40945.6
631	128.468												631			0	0
632	120.69												632	2657	321	320673	38741.5
633	112.715												633			0	0
634	104.462												634	2803	333	292807	34785.8
635	96.2477												635			0	0
636	88.3324												636	2917	352	257666	31093
637	80.5481												637			0	0
638	72.7846												638	3070	376	223449	27367
639	65.4082												639			0	0
640	58.6366												640	3220	396	188810	23220.1
641	52.392												641			0	0
642	46.8098												642	3418	416	159996	19472.9
643	42.2347												643			0	0
644	38.5962												644	3613	439	139448	16943.7
645	35.715												645			0	0
646	33.3918												646	3791	460	126588	15360.2
647	31.5424												647			0	0
648	30.1353												648	3982	485	119999	14615.6
649	29.1606												649			0	0
650	28.5682												650	4242	510	121186	14569.8
651	28.1223												651			0	0
652	27.63												652	4444	531	122788	14671.5
653	27.0238												653			0	0
654	26.3404												654	4624	558	121798	14697.9
655	25.6131												655			0	0
656	24.9045												656	4887	587	121708	14618.9
657	24.2462												657			0	0
658	23.5678												658	5089	611	119937	14399.9
659	22.8332												659			0	0
660	22.146												660	5250	634	116266	14040.6
661	21.528												661			0	0
662	21.0448												662	5414	660	113937	13889.6
663	20.6975												663			0	0
664	20.4992												664	5535	680	113463	13939.5
665	20.3937												665			0	0
666	20.2965												666	5601	705	113681	14309
667	20.1881												667			0	0
668	20.0421												668	5582	724	111875	14510.5
669	19.9017												669			0	0
670	19.782												670	5519	740	109177	14638.7
671	19.5513												671			0	0
672	19.1826												672	5322	754	102090	14463.7
673	18.738												673			0	0
674	18.2668												674	5115	765	93434.7	13974.1
675	17.7993												675			0	0
676	17.3476												676	4764	784	82644	13600.5
677	16.9309												677			0	0
678	16.5167												678	4378	798	72310.1	13180.3
679	16.064												679			0	0
680	15.5683												680	4052	809	63082.8	12594.8
681	15.1211												681			0	0
682	14.8079												682	3594	826	53219.6	12231.3
683	14.6291												683			0	0
684	14.4683												684	3119	842	45126.6	12182.3
685	14.1389												685			0	0
686	13.6883												686	2689	857	36807.8	11730.9
687	13.286												687			0	0
688	13.063												688	2307	878	30136.3	11469.3
689	13.0103												689			0	0
690	12.9034												690	1906	899	24593.9	11600.2
691	12.659												691			0	0
692	12.2876												692	1563	917	19205.5	11267.7
693	11.7689												693			0	0
694	11.1126												694	1276	942	14179.7	10468.1
695	10.4363												695			0	0
696	9.94728												696	1014	965	10086.5	9599.13
697	9.62572												697			0	0
698	9.34338												698	809	994	7558.79	9287.32
699	8.97896												699			0	0
700	8.52883												700	649	1027	5535.21	8759.11
701	8.2444												701			0	0
702	8.36181												702	527	1054	4406.67	8813.35
703	8.8997												703			0	0
704	9.69203												704	427	1089	4138.5	10554.6
705	10.7368												705			0	0
706	12.2488												706	331	1125	4054.35	13779.9
707	14.2005												707			0	0
708	16.3679												708	277	1151	4533.91	18839.5
709	18.6543												709			0	0
710	20.9603												710	236	1195	4946.63	25047.6
711	23.1039												711			0	0
712	24.9226												712	187	1232	4660.53	30704.6
713	26.316												713			0	0
714	27.1424												714	169	1268	4587.07	34416.6
715	27.4124												715			0	0
716	27.2187												716	147	1298	4001.15	35329.9
717	26.537												717			0	0
718	25.3151												718	135	1337	3417.54	33846.3
719	23.7132												719			0	0
720	21.8638												720	117	1374	2558.06	30040.9
721	19.8505												721			0	0
722	17.7556												722	103	1405	1828.83	24946.6
723	15.7628												723			0	0
724	13.967												724	103	1438	1438.6	20084.5
725	12.3666												725			0	0
726	11.0409												726	92.1	1459	1016.87	16108.7
727	9.94889												727			0	0
728	8.92311												728	92.1	1483	821.818	13233
729	7.99815												729			0	0
730	7.21676												730	80.8	1502	583.114	10839.6
731	6.52878												731			0	0
732	5.92803												732	80.8	1508	478.985	8939.47
733	5.51052												733			0	0
734	5.36522												734	73.3	1513	393.271	8117.58
735	5.38685												735			0	0
736	5.28645												736	73.3	1505	387.497	7956.11
737	5.01917												737			0	0
738	4.78015												738	73.3	1488	350.385	7112.86
739	4.60999												739			0	0
740	4.61104												740	73.3	1467	337.989	6764.4
741	4.61102												741			0	0
742	4.41914												742	73.3	1435	323.923	6341.47
743	4.25336												743			0	0
744	4.26827												744	73.3	1394	312.864	5949.97
745	4.45289												745			0	0
746	4.65995												746	73.3	1338	341.574	6235.01
747	4.55479												747			0	0
748	4.44666												748	61.9	1281	275.248	5696.17
749	4.57648												749			0	0
750	4.63729												750	61.9	1209	287.048	5606.48
751	4.35196												751			0	0
752	4.22828												752	61.9	1132	261.731	4786.41
753	4.56866												753			0	0
754	4.74748												754	61.9	1056	293.869	5013.34
755	4.60354												755			0	0
756	4.48937												756	61.9	983	277.892	4413.05
757	4.30823												757			0	0
758	4.26711												758	61.9	903	264.134	3853.2
759	4.41883												759			0	0
760	4.5489												760	61.9	839	281.577	3816.53
761	4.52987												761			0	0
762	4.39186												762	61.9	738	271.856	3241.19
763	4.04807												763			0	0
764	3.47181												764	61.9	677	214.905	2350.42
765	3.17207												765			0	0
766	3.15417												766	61.9	616	195.243	1942.97
767	2.96444												767			0	0
768	2.72239												768	61.9	539	168.516	1467.37
769	2.7194												769			0	0
770	2.64079												770	49.8	475	131.511	1254.38
771	2.2095												771			0	0
772	1.95051												772	49.8	422	97.1354	823.115
773	2.09687												773			0	0
774	2.22485												774	49.8	367	110.798	816.52
775	1.27078												775			0	0
776	1.11579												776	49.8	322	55.5663	359.284
777	1.21668												777			0	0
778	1.21388												778	49.8	287	60.4512	348.384
779	0.650209												779			0	0
780	0												780	49.8	248	0	0
781													781			0	0
782													782	49.8	224	0	0
783													783			0	0
784													784	49.8	196	0	0
785													785			0	0
786													786	49.8	177	0	0
787													787			0	0
788													788	49.8	153	0	0
789													789			0	0
790													790	49.8	138	0	0
791													791			0	0
792													792	49.8	130	0	0
793													793			0	0
794													794	49.8	117	0	0
795													795			0	0
796													796	49.8	102	0	0
797													797			0	0
798													798	49.8	92.2	0	0
799													799			0	0
800													800	49.8	92.2	0	0
	29613															1.32098e+07	2.70701e+06
																446.081	91.413

## Sheet: Sample data
	Weighted average cross section [ m2 mol–1 ]									Blue Led	Green LED	Red LED	Far red LED	Fluorescent lump
	σr	σfr							381	0.00104434	2.49776e-40	0.00139464	0	1.63171
	[ m2 mol–1 ]	[ m2 mol–1 ]							382	0.00154346	7.71798e-40	0.00117974	2.17729e-70	1.58771
									383	0.00198436	0.00114868	0.00109156	3.41953e-50	1.64319
Blue LED	53.3	41.4							384	0.00230917	0.00121287	0.00128535	1.11949e-40	1.78785
peak: 471 nm									385	0.00198156	6.61348e-40	0.00107771	2.0652e-40	2.53665
Green LED	126.2	20.5							386	0.00197093	7.41143e-40	0.00119269	2.0652e-40	2.50657
peak: 531 nm									387	0.00185271	8.35687e-40	0.00122921	2.08929e-40	2.60917
Red LED	1384	173							388	0.00162165	7.88348e-40	0.00131697	2.42834e-40	2.75029
peak: 632 nm									389	0.00134229	6.12506e-40	0.00137654	2.99261e-40	2.79762
Far red LED	59	609							390	0.00110668	4.78902e-40	0.00125592	3.03584e-40	2.81957
peak: 745 nm									391	9.06509e-40	4.59246e-40	0.0011426	2.58369e-40	2.84236
Fluorescent lump	446.1	91.4							392	7.38377e-40	5.67375e-40	0.00117689	2.31063e-40	2.79446
									393	6.57384e-40	6.8753e-40	0.00124997	2.35966e-40	2.65226
									394	6.73992e-40	7.65445e-40	0.00129911	2.5176e-40	2.48425
									395	8.41114e-40	8.45647e-40	0.00129353	2.84271e-40	2.4052
									396	0.00110151	8.86527e-40	0.00116132	3.25164e-40	2.60849
									397	0.00133234	8.27906e-40	9.47374e-40	3.54757e-40	3.20641
									398	0.00146048	6.87949e-40	7.81374e-40	3.76446e-40	4.44467
									399	0.00148936	5.70211e-40	6.91489e-40	3.61169e-40	6.5267
									400	0.00146806	5.38844e-40	6.91584e-40	2.98759e-40	9.3407
									401	0.00150194	5.38844e-40	7.90634e-40	2.6822e-40	12.467
									402	0.00165366	5.15124e-40	9.13772e-40	2.73071e-40	15.7218
									403	0.00185932	4.75143e-40	9.89895e-40	2.49223e-40	19.1641
									404	0.00204981	4.80018e-40	0.0010368	2.20101e-40	22.5049
									405	0.00213432	5.32938e-40	0.00107909	2.0602e-40	25.4244
									406	0.00204922	5.74033e-40	0.00112413	2.01037e-40	27.7047
									407	0.00187809	6.34975e-40	0.00117878	2.02667e-40	29.3346
									408	0.00173045	7.65152e-40	0.00126044	1.91386e-40	30.3698
									409	0.00174086	8.69813e-40	0.00147699	1.86102e-40	30.5277
									410	0.0019273	8.93775e-40	0.00180896	2.04755e-40	29.7559
									411	0.00219308	8.93775e-40	0.00189844	2.20297e-40	28.3507
									412	0.00235045	9.40529e-40	0.00177165	2.18604e-40	26.6588
									413	0.00232835	0.00107496	0.00160317	2.164e-40	24.8541
									414	0.0022671	0.00112445	0.00147481	2.19065e-40	23.0038
									415	0.00228042	0.00105208	0.00143523	2.24854e-40	21.451
									416	0.0024222	9.35878e-40	0.00150492	2.46009e-40	20.5981
									417	0.00270955	8.21353e-40	0.00162542	2.42317e-40	20.4758
									418	0.00318772	7.21164e-40	0.00171539	2.05512e-40	20.8347
									419	0.00355132	6.59967e-40	0.00179208	2.04045e-40	21.7259
									420	0.00376292	7.07273e-40	0.00173232	2.24011e-40	23.0471
									421	0.00402445	8.83879e-40	0.00148397	2.47272e-40	24.6178
									422	0.00426074	0.00102652	0.00134674	2.82938e-40	26.4513
									423	0.00442308	0.00100862	0.0013295	3.1264e-40	28.6052
									424	0.00465131	8.56816e-40	0.00138127	3.26471e-40	31.0054
									425	0.00499201	7.27315e-40	0.00143059	3.47788e-40	33.6539
									426	0.00545149	6.74652e-40	0.00144539	3.82333e-40	36.61
									427	0.00600759	7.03326e-40	0.00140933	3.93513e-40	40.726
									428	0.00654323	7.78119e-40	0.00138209	3.94746e-40	47.1012
									429	0.00688469	7.9132e-40	0.00145356	4.32933e-40	57.9918
									430	0.00739768	7.46692e-40	0.00147589	4.72989e-40	72.5835
									431	0.00814491	7.13886e-40	0.00134575	4.88727e-40	89.6662
									432	0.0089833	6.10107e-40	0.001296	4.77017e-40	107.812
									433	0.0100085	5.09633e-40	0.00141004	4.58136e-40	126.299
									434	0.0112514	4.93642e-40	0.00161079	4.33341e-40	144.629
									435	0.0127561	5.28301e-40	0.00178144	4.05052e-40	161.315
									436	0.0146144	6.22236e-40	0.0019	3.82388e-40	175.092
									437	0.0167392	6.80437e-40	0.00199221	3.49204e-40	185.75
									438	0.0191796	6.47232e-40	0.00206478	3.21082e-40	192.732
									439	0.0221296	5.59157e-40	0.00206546	3.14037e-40	195.873
									440	0.0258465	5.134e-40	0.00198324	2.95921e-40	193.693
									441	0.0303752	4.73512e-40	0.00193551	2.66272e-40	187.021
									442	0.0355166	4.64856e-40	0.00210163	2.39225e-40	177.311
									443	0.0413748	5.34925e-40	0.00225791	2.12954e-40	166.147
									444	0.0483785	5.64083e-40	0.00224339	1.82785e-40	154.092
									445	0.0563854	5.60212e-40	0.00216163	1.68414e-40	141.622
									446	0.0650872	5.25553e-40	0.00207391	1.61037e-40	130.331
									447	0.0751014	4.31618e-40	0.00199966	1.46019e-40	121.32
									448	0.0867876	3.88619e-40	0.00188687	1.38535e-40	114.667
									449	0.100152	4.32194e-40	0.00169465	1.39044e-40	110.014
									450	0.115434	4.74676e-40	0.00157355	1.42258e-40	106.573
									451	0.132804	4.86106e-40	0.00155045	1.53453e-40	103.787
									452	0.153458	5.19888e-40	0.00156841	1.53138e-40	101.757
									453	0.177897	4.81316e-40	0.00152117	1.46933e-40	100.119
									454	0.206133	4.07408e-40	0.00141655	1.52962e-40	98.6279
									455	0.238955	4.06889e-40	0.00135044	1.79075e-40	97.2511
									456	0.277075	4.35095e-40	0.00129729	2.14944e-40	95.9645
									457	0.320755	4.67563e-40	0.00123053	2.39712e-40	95.0092
									458	0.369132	4.9987e-40	0.0011254	2.52264e-40	94.4452
									459	0.421812	5.16809e-40	0.00100977	2.53332e-40	94.1679
									460	0.479092	5.49835e-40	9.68911e-40	2.60225e-40	93.9661
									461	0.540638	6.61274e-40	9.21877e-40	2.67166e-40	93.7588
									462	0.605337	8.26377e-40	8.42046e-40	2.5561e-40	93.3183
									463	0.670605	0.0010194	7.46973e-40	2.58707e-40	92.3731
									464	0.734478	0.00128341	6.55283e-40	2.83744e-40	91.1856
									465	0.795842	0.00146872	5.58571e-40	2.89134e-40	89.6218
									466	0.852736	0.00157913	4.62933e-40	2.68716e-40	87.7024
									467	0.901615	0.00173322	3.84037e-40	2.4103e-40	85.7186
									468	0.941549	0.00194941	3.4155e-40	2.28242e-40	83.3495
									469	0.971799	0.00227941	3.81768e-40	2.39544e-40	80.5486
									470	0.991416	0.00260418	5.10963e-40	2.50639e-40	77.6488
									471	1	0.0028442	6.94168e-40	2.38134e-40	74.8674
									472	0.998448	0.00311598	7.80644e-40	2.35667e-40	72.2024
									473	0.986933	0.00339726	7.82288e-40	2.48983e-40	69.896
									474	0.965713	0.00356473	7.48249e-40	2.56235e-40	67.9003
									475	0.936862	0.00375685	6.8477e-40	2.35781e-40	66.3333
									476	0.901568	0.00419644	6.28525e-40	2.12564e-40	65.6399
									477	0.860405	0.00474522	6.03659e-40	2.22639e-40	66.3964
									478	0.816854	0.00532829	5.94989e-40	2.42212e-40	68.4383
									479	0.772353	0.00593185	5.69545e-40	2.50357e-40	72.2691
									480	0.727713	0.00652705	4.85834e-40	2.56712e-40	77.8347
									481	0.683963	0.00724818	3.46105e-40	2.91874e-40	84.862
									482	0.641791	0.00811625	1.62159e-40	3.31888e-40	93.3584
									483	0.600052	0.0090388	7.48196e-50	3.42989e-40	103.276
									484	0.558885	0.0102115	5.64361e-50	3.49383e-40	114.09
									485	0.520016	0.0117333	6.09122e-50	3.55627e-40	125.128
									486	0.48347	0.0134382	9.13374e-50	3.65081e-40	135.571
									487	0.448775	0.0150723	1.2361e-40	3.79213e-40	145.056
									488	0.416153	0.0168358	1.4117e-40	3.69364e-40	153.051
									489	0.385356	0.0190109	1.46326e-40	3.44774e-40	159.324
									490	0.35582	0.0215264	1.50805e-40	3.23558e-40	163.27
									491	0.327647	0.0243665	1.70149e-40	2.93349e-40	164.789
									492	0.301366	0.0275416	2.31649e-40	2.49679e-40	163.961
									493	0.276491	0.031066	3.44061e-40	2.21382e-40	160.718
									494	0.253382	0.0355949	4.03067e-40	2.07688e-40	155.131
									495	0.232419	0.040809	4.34033e-40	1.88413e-40	147.68
									496	0.212749	0.0464461	4.98851e-40	1.54229e-40	138.973
									497	0.194248	0.0527028	5.40465e-40	1.32187e-40	129.592
									498	0.177353	0.059878	5.50786e-40	1.36057e-40	119.835
									499	0.16195	0.0680979	5.97465e-40	1.37512e-40	109.9
									500	0.147838	0.0770839	6.79463e-40	1.37121e-40	99.8808
									501	0.135045	0.0872599	7.5776e-40	1.48175e-40	90.0579
									502	0.123632	0.0988749	8.59608e-40	1.56873e-40	80.7296
									503	0.113291	0.112402	0.00101356	1.52322e-40	71.9824
									504	0.103798	0.128017	0.00103007	1.41916e-40	63.9419
									505	0.0949665	0.145202	9.51159e-40	1.24881e-40	56.7326
									506	0.0866612	0.164651	9.01163e-40	1.23034e-40	50.4635
									507	0.0792025	0.186812	8.15064e-40	1.46723e-40	45.0871
									508	0.0726521	0.211875	7.8134e-40	1.45466e-40	40.4466
									509	0.0666014	0.240084	8.14375e-40	1.24892e-40	36.5587
									510	0.0609948	0.271644	8.35991e-40	1.26049e-40	33.2971
									511	0.0561127	0.307014	8.17184e-40	1.40708e-40	30.607
									512	0.0519371	0.346017	7.77125e-40	1.4936e-40	28.3613
									513	0.0479852	0.38708	6.73378e-40	1.71316e-40	26.5463
									514	0.0440864	0.430202	4.56745e-40	2.03151e-40	25.0625
									515	0.0403514	0.476089	3.27817e-40	2.10648e-40	23.8468
									516	0.0369516	0.52411	3.74204e-40	2.12356e-40	22.755
									517	0.0342681	0.573336	4.61759e-40	2.11902e-40	21.5842
									518	0.0320348	0.62292	5.61787e-40	1.99534e-40	20.4578
									519	0.0297742	0.672177	6.34009e-40	2.00695e-40	19.4841
									520	0.0277695	0.72073	6.82256e-40	2.01838e-40	18.6256
									521	0.0260603	0.767501	7.22984e-40	1.91434e-40	17.8335
									522	0.0242247	0.810572	7.94945e-40	1.79604e-40	17.1418
									523	0.0222774	0.849795	8.59079e-40	1.65511e-40	16.5421
									524	0.020637	0.886489	8.77487e-40	1.35506e-40	15.9744
									525	0.0193277	0.919284	8.90648e-40	1.11999e-40	15.4802
									526	0.0183107	0.946942	8.91393e-40	1.2171e-40	15.0093
									527	0.0172664	0.967957	8.91179e-40	1.20952e-40	14.8174
									528	0.0160769	0.983035	8.56965e-40	9.91421e-50	14.9567
									529	0.0149239	0.993221	8.12054e-40	8.83363e-50	15.3125
									530	0.0138798	0.998823	7.73696e-40	8.58251e-50	16.1448
									531	0.0128625	1	7.61464e-40	8.30772e-50	17.6463
									532	0.0118366	0.996347	6.93255e-40	1.00815e-40	20.7304
									533	0.0109275	0.989279	5.48406e-40	1.38862e-40	25.6446
									534	0.0101205	0.978489	4.70465e-40	1.5055e-40	35.2008
									535	0.00935776	0.963868	4.97555e-40	1.49702e-40	50.2152
									536	0.00860002	0.945612	6.03285e-40	1.45298e-40	73.5142
									537	0.00784025	0.924539	7.02824e-40	1.42442e-40	104.967
									538	0.00722776	0.902938	6.91503e-40	1.70961e-40	144.768
									539	0.00683075	0.880258	6.81845e-40	2.00838e-40	191.826
									540	0.00662482	0.855962	7.16605e-40	2.11501e-40	245.628
									541	0.00638677	0.829589	7.88563e-40	2.17669e-40	300.306
									542	0.00606975	0.80094	8.5786e-40	2.24115e-40	354.728
									543	0.00574551	0.771335	8.82654e-40	2.08954e-40	405.252
									544	0.00548764	0.740675	9.21273e-40	1.69562e-40	450.118
									545	0.00530714	0.709125	9.38768e-40	1.54721e-40	484.823
									546	0.00520128	0.677559	9.56264e-40	1.60304e-40	508.709
									547	0.00514687	0.646971	9.62124e-40	1.68661e-40	519.087
									548	0.00501653	0.616167	0.00100228	1.62571e-40	516.416
									549	0.00482591	0.584754	0.00113344	1.37095e-40	500.432
									550	0.00462629	0.553355	0.00122547	1.34626e-40	473.091
									551	0.00434998	0.522164	0.00125067	1.45849e-40	435.297
									552	0.00412071	0.491701	0.00121667	1.37326e-40	393.195
									553	0.00390333	0.462347	0.00117474	1.33479e-40	348.22
									554	0.003698	0.43414	0.0012548	1.48639e-40	303.435
									555	0.00356324	0.407538	0.00134932	1.5612e-40	260.852
									556	0.00343243	0.382755	0.00139288	1.54976e-40	222.321
									557	0.00320488	0.359234	0.00140404	1.65947e-40	188.232
									558	0.00292155	0.336637	0.00137144	1.77412e-40	158.419
									559	0.00278321	0.315541	0.0013216	1.86991e-40	132.651
									560	0.00272121	0.29608	0.00127014	1.89333e-40	111.061
									561	0.0025432	0.27794	0.00124754	1.61831e-40	93.0003
									562	0.00233253	0.261362	0.00125911	1.47081e-40	78.2819
									563	0.00215822	0.246343	0.00129937	1.77741e-40	66.4009
									564	0.00206641	0.232795	0.00133784	2.06726e-40	56.5735
									565	0.00208967	0.220449	0.00137121	2.21666e-40	48.5445
									566	0.00213357	0.208817	0.00148232	2.52429e-40	42.0666
									567	0.00213914	0.197714	0.00162182	2.95094e-40	36.985
									568	0.00213748	0.186844	0.00167859	3.14453e-40	32.7616
									569	0.00215705	0.176396	0.00174528	3.25734e-40	29.6593
									570	0.00216126	0.166578	0.00186934	3.45813e-40	27.7209
									571	0.00222906	0.15731	0.00206727	3.57634e-40	26.7935
									572	0.00238447	0.148542	0.00233326	3.64798e-40	26.7157
									573	0.00238515	0.140216	0.00261809	3.79471e-40	27.5766
									574	0.00228302	0.132223	0.00290899	3.84647e-40	29.4267
									575	0.00222473	0.124336	0.00319858	3.78946e-40	32.7673
									576	0.00217991	0.116473	0.00350879	3.58493e-40	37.5424
									577	0.00210223	0.108667	0.00384257	3.1853e-40	43.5058
									578	0.0019978	0.101312	0.00429378	2.75554e-40	50.8099
									579	0.00192012	0.0946053	0.0049453	2.39838e-40	59.4766
									580	0.0018598	0.0884319	0.00562199	2.03885e-40	68.9353
									581	0.00177318	0.0826926	0.00627511	1.64522e-40	79.0707
									582	0.00159813	0.0772447	0.0068806	1.44741e-40	90.0652
									583	0.00138715	0.0721658	0.00748424	1.4088e-40	101.308
									584	0.00138523	0.0673081	0.00819156	1.10294e-40	111.724
									585	0.00148795	0.0627489	0.00891052	6.60514e-50	121.22
									586	0.00152928	0.0585342	0.00961066	3.35225e-50	129.554
									587	0.00153524	0.0546929	0.0104643	1.78048e-50	136.449
									588	0.00152997	0.0513417	0.0114749	2.20161e-50	141.853
									589	0.00158712	0.0484003	0.0126192	5.24969e-50	144.818
									590	0.0017198	0.0456273	0.0138923	9.30879e-50	145.545
									591	0.0018701	0.0426768	0.0153883	1.1435e-40	144.68
									592	0.00198048	0.0398346	0.0170596	1.22652e-40	142.07
									593	0.00202155	0.0374925	0.0188569	1.20185e-40	137.357
									594	0.0020505	0.0353625	0.0207734	1.15203e-40	131.301
									595	0.00205234	0.0332777	0.0227605	1.14122e-40	124.759
									596	0.00204065	0.0313261	0.0251863	1.14228e-40	117.746
									597	0.0020201	0.0294809	0.0281417	1.14228e-40	110.273
									598	0.00191098	0.0278573	0.0314748	1.11043e-40	102.753
									599	0.00175541	0.0264153	0.0351067	1.10134e-40	95.2628
									600	0.00161149	0.0248446	0.0389164	1.06179e-40	88.6737
									601	0.00145999	0.0233412	0.0430192	1.01513e-40	82.9104
									602	0.00127961	0.0222567	0.0475047	1.17021e-40	77.7171
									603	0.00109842	0.0212588	0.0528473	1.51094e-40	74.1105
									604	9.72416e-40	0.0200812	0.0592228	1.9981e-40	72.5533
									605	9.22204e-40	0.0188274	0.0665379	2.24493e-40	76.7531
									606	9.076e-40	0.0176382	0.0748494	2.26365e-40	86.7703
									607	9.08708e-40	0.0165809	0.0841989	2.26365e-40	101.863
									608	8.95053e-40	0.01563	0.0947489	2.33354e-40	121.379
									609	8.91999e-40	0.014722	0.106676	2.56161e-40	144.346
									610	9.2309e-40	0.013803	0.120109	2.75441e-40	169.001
									611	9.40888e-40	0.0128795	0.135179	2.71402e-40	194.378
									612	9.00639e-40	0.0120125	0.152771	2.46821e-40	218.334
									613	8.21811e-40	0.0111794	0.172985	2.11992e-40	240.324
									614	8.21367e-40	0.010532	0.195345	1.81797e-40	258.631
									615	8.82918e-40	0.0100295	0.22012	1.53397e-40	273.195
									616	8.29516e-40	0.00963652	0.248102	1.55328e-40	280.78
									617	6.86844e-40	0.00932061	0.27955	1.79833e-40	281.712
									618	5.2287e-40	0.00888997	0.314411	2.02498e-40	277.052
									619	4.54999e-40	0.00842194	0.353349	2.29311e-40	267.589
									620	5.59401e-40	0.00797821	0.396577	2.56426e-40	254.199
									621	6.37688e-40	0.00768995	0.444213	2.58932e-40	238.59
									622	6.53084e-40	0.00758608	0.496734	2.49422e-40	221.759
									623	7.17353e-40	0.00747421	0.553811	2.64959e-40	205.981
									624	8.30008e-40	0.00729903	0.614593	3.07569e-40	191.609
									625	9.03029e-40	0.00696655	0.677976	3.57561e-40	179.287
									626	9.31044e-40	0.00655594	0.742438	3.88353e-40	168.917
									627	9.54312e-40	0.00622459	0.806672	3.86523e-40	159.981
									628	0.00104113	0.00583327	0.865683	3.87721e-40	151.729
									629	0.00119416	0.0053481	0.917281	4.05915e-40	143.723
									630	0.00129226	0.00491002	0.957952	4.24075e-40	136.032
									631	0.00128222	0.00455594	0.985932	4.32531e-40	128.468
									632	0.00126059	0.00425006	1	4.60183e-40	120.69
									633	0.0012766	0.00388786	0.999409	5.17374e-40	112.715
									634	0.00134624	0.00340634	0.983293	5.92894e-40	104.462
									635	0.0014	0.00293939	0.952907	6.3729e-40	96.2477
									636	0.00139753	0.00258764	0.909654	6.23603e-40	88.3324
									637	0.00136301	0.00235626	0.855524	6.27727e-40	80.5481
									638	0.00133687	0.00220975	0.791628	6.74912e-40	72.7846
									639	0.00129023	0.00217254	0.723445	6.9903e-40	65.4082
									640	0.00118907	0.0022652	0.653504	6.95858e-40	58.6366
									641	0.00104211	0.00233592	0.584892	6.91051e-40	52.392
									642	9.01048e-40	0.00231584	0.519396	7.06837e-40	46.8098
									643	8.23809e-40	0.00217341	0.458274	7.59751e-40	42.2347
									644	7.91947e-40	0.00199165	0.40232	7.64048e-40	38.5962
									645	7.32444e-40	0.0019	0.35207	6.92839e-40	35.715
									646	6.24629e-40	0.00185547	0.307649	6.71744e-40	33.3918
									647	5.15088e-40	0.00177167	0.268929	7.33957e-40	31.5424
									648	4.54545e-40	0.00159119	0.234867	8.01237e-40	30.1353
									649	4.34526e-40	0.00134326	0.205192	8.51017e-40	29.1606
									650	3.93289e-40	0.00112982	0.179362	9.11985e-40	28.5682
									651	3.41418e-40	9.71069e-40	0.156922	9.90865e-40	28.1223
									652	3.24059e-40	8.25522e-40	0.137491	0.00106504	27.63
									653	3.46097e-40	7.03839e-40	0.120725	0.0010825	27.0238
									654	3.75806e-40	6.11227e-40	0.106486	0.00105304	26.3404
									655	3.46137e-40	5.57805e-40	0.0943375	0.00110523	25.6131
									656	2.85147e-40	5.71201e-40	0.0839721	0.00124928	24.9045
									657	3.1246e-40	6.21972e-40	0.074672	0.00138995	24.2462
									658	3.73442e-40	6.86074e-40	0.0663784	0.00150398	23.5678
									659	3.97228e-40	7.8475e-40	0.0593027	0.00161515	22.8332
									660	4.66297e-40	9.01283e-40	0.0531706	0.00174265	22.146
									661	5.84484e-40	0.00103066	0.0477346	0.00189234	21.528
									662	6.5393e-40	0.00116832	0.042918	0.00204537	21.0448
									663	6.72134e-40	0.00129415	0.0387263	0.00221459	20.6975
									664	6.65053e-40	0.00138379	0.0350916	0.00245547	20.4992
									665	6.58623e-40	0.00141444	0.0318109	0.00275501	20.3937
									666	6.84556e-40	0.00139397	0.0286866	0.00305366	20.2965
									667	6.81636e-40	0.001394	0.0259864	0.00335048	20.1881
									668	6.02508e-40	0.00141488	0.0238376	0.00365843	20.0421
									669	5.30024e-40	0.00140198	0.0219587	0.00398399	19.9017
									670	5.31366e-40	0.00137647	0.0202477	0.00433045	19.782
									671	5.52092e-40	0.00142474	0.0187861	0.00469803	19.5513
									672	5.57028e-40	0.0015458	0.0175585	0.00510465	19.1826
									673	5.94568e-40	0.00168373	0.0164752	0.00557304	18.738
									674	6.52613e-40	0.00174474	0.0155201	0.00608937	18.2668
									675	6.77225e-40	0.0017165	0.0146845	0.00663229	17.7993
									676	6.49813e-40	0.0017703	0.0140602	0.00720496	17.3476
									677	5.80092e-40	0.00193214	0.0137275	0.00780699	16.9309
									678	5.25397e-40	0.001964	0.0133879	0.00842605	16.5167
									679	5.11001e-40	0.00184174	0.0128662	0.00909152	16.064
									680	5.11001e-40	0.00173927	0.0123296	0.00985051	15.5683
									681	4.85873e-40	0.00174283	0.0118781	0.0107144	15.1211
									682	4.04592e-40	0.00181312	0.0114473	0.0116702	14.8079
									683	3.2805e-40	0.00185325	0.0109592	0.0126679	14.6291
									684	2.93168e-40	0.00180409	0.0104972	0.0137054	14.4683
									685	2.52694e-40	0.00172072	0.0102016	0.0148488	14.1389
									686	2.28907e-40	0.00169376	0.00996142	0.0161109	13.6883
									687	2.76501e-40	0.00167401	0.00960792	0.0174645	13.286
									688	3.39062e-40	0.00160615	0.00914685	0.0189267	13.063
									689	3.7132e-40	0.00159086	0.00861193	0.0205603	13.0103
									690	4.41069e-40	0.00169046	0.00807156	0.0224557	12.9034
									691	5.48595e-40	0.00180747	0.00761903	0.0246266	12.659
									692	6.08134e-40	0.00175258	0.00726451	0.0270199	12.2876
									693	6.32308e-40	0.00151232	0.0069216	0.0295525	11.7689
									694	6.61828e-40	0.00125405	0.00656218	0.0321788	11.1126
									695	7.40067e-40	0.00106668	0.00627417	0.0350219	10.4363
									696	9.08839e-40	9.91369e-40	0.00598371	0.0381511	9.94728
									697	0.00104308	0.00100489	0.00563992	0.041544	9.62572
									698	0.00104069	0.00102511	0.00534072	0.0452586	9.34338
									699	9.93462e-40	0.00106687	0.00508185	0.0493664	8.97896
									700	0.00101225	0.00111136	0.00492781	0.0538703	8.52883
									701	0.00109732	0.00103277	0.00498618	0.0586793	8.2444
									702	0.00117707	8.90982e-40	0.00501046	0.0637796	8.36181
									703	0.00124445	8.76508e-40	0.00477175	0.0692869	8.8997
									704	0.00127644	0.00104225	0.00455246	0.0754308	9.69203
									705	0.00123325	0.00127645	0.00460874	0.0823413	10.7368
									706	0.00114965	0.00138678	0.0047684	0.0897822	12.2488
									707	0.00102942	0.00136187	0.00479295	0.0977054	14.2005
									708	9.04002e-40	0.00130113	0.00463948	0.106346	16.3679
									709	8.32897e-40	0.00119843	0.00454756	0.115693	18.6543
									710	8.11508e-40	0.00104645	0.00473061	0.125623	20.9603
									711	7.60461e-40	9.14218e-40	0.00489479	0.136149	23.1039
									712	6.05642e-40	8.65229e-40	0.00476374	0.147337	24.9226
									713	4.18364e-40	8.47851e-40	0.00462795	0.159246	26.316
									714	3.15213e-40	7.77935e-40	0.00473592	0.171955	27.1424
									715	3.41432e-40	5.87407e-40	0.00489601	0.185522	27.4124
									716	4.17437e-40	3.31042e-40	0.00494195	0.200134	27.2187
									717	4.00628e-40	2.32161e-40	0.00490785	0.216138	26.537
									718	3.92049e-40	3.27702e-40	0.00505391	0.233272	25.3151
									719	5.36982e-40	4.92025e-40	0.00557689	0.25123	23.7132
									720	7.62686e-40	6.82618e-40	0.00600772	0.270331	21.8638
									721	0.00102679	8.72958e-40	0.00599591	0.290859	19.8505
									722	0.00140646	9.64655e-40	0.00586137	0.31283	17.7556
									723	0.00186483	9.64655e-40	0.00587929	0.33638	15.7628
									724	0.00227368	9.64655e-40	0.00612008	0.361765	13.967
									725	0.00255043	9.64655e-40	0.00633386	0.388826	12.3666
									726	0.00259976	0.0010035	0.00628532	0.417366	11.0409
									727	0.00253633	0.00119073	0.00606392	0.447339	9.94889
									728	0.00249544	0.00154321	0.0057186	0.478823	8.92311
									729	0.00241541	0.00192554	0.00510959	0.512524	7.99815
									730	0.00224652	0.0021871	0.00423007	0.548637	7.21676
									731	0.00208213	0.00213684	0.00346868	0.586466	6.52878
									732	0.0019099	0.00198449	0.00303782	0.625576	5.92803
									733	0.0016176	0.00206055	0.00287961	0.665609	5.51052
									734	0.00121673	0.00234722	0.00272618	0.706902	5.36522
									735	8.21501e-40	0.00270569	0.00234366	0.74908	5.38685
									736	5.20986e-40	0.00296669	0.00207044	0.790507	5.28645
									737	3.80764e-40	0.00303797	0.0021561	0.830368	5.01917
									738	3.35272e-40	0.00288116	0.00240982	0.868166	4.78015
									739	3.26233e-40	0.00253453	0.00274403	0.903212	4.60999
									740	3.36513e-40	0.00225969	0.00314588	0.933961	4.61104
									741	3.96718e-40	0.00204021	0.00371483	0.959344	4.61102
									742	5.11952e-40	0.00193188	0.00444576	0.978538	4.41914
									743	5.58152e-40	0.00193484	0.00486486	0.991847	4.25336
									744	4.95185e-40	0.00190095	0.00473106	0.99945	4.26827
									745	4.3769e-40	0.00182937	0.00464624	1	4.45289
									746	4.38909e-40	0.00172455	0.00478396	0.993262	4.65995
									747	5.27822e-40	0.00156816	0.00484212	0.980814	4.55479
									748	6.70009e-40	0.00145752	0.00485673	0.963093	4.44666
									749	8.22449e-40	0.00141621	0.00507619	0.939792	4.57648
									750	0.00102257	0.00139777	0.00547299	0.911076	4.63729
									751	0.00127564	0.00128171	0.00592487	0.878033	4.35196
									752	0.00137756	0.00112476	0.00592906	0.842529	4.22828
									753	0.00122713	0.00105736	0.0052718	0.806016	4.56866
									754	0.00108906	0.00100125	0.00475908	0.767432	4.74748
									755	0.00106466	9.21248e-40	0.00469865	0.726747	4.60354
									756	0.00107421	0.00104053	0.00489351	0.685834	4.48937
									757	0.00116544	0.00122392	0.00509478	0.644836	4.30823
									758	0.00144157	0.001273	0.0051079	0.603803	4.26711
									759	0.00171612	0.001273	0.00489773	0.562979	4.41883
									760	0.00179701	0.00126643	0.00441747	0.522946	4.5489
									761	0.00170033	0.00121349	0.00402547	0.484368	4.52987
									762	0.00145557	0.00108779	0.00399013	0.447573	4.39186
									763	0.00127889	9.9394e-40	0.0043791	0.412342	4.04807
									764	0.00125277	9.80063e-40	0.00521021	0.378444	3.47181
									765	0.00125935	9.78964e-40	0.00587042	0.346149	3.17207
									766	0.00135858	9.25102e-40	0.00624859	0.315773	3.15417
									767	0.00177293	5.90723e-40	0.00621106	0.286971	2.96444
									768	0.00215504	1.53686e-40	0.0059713	0.260013	2.72239
									769	0.00196272	0	0.00595668	0.23515	2.7194
									770	0.00164902	0	0.00601993	0.212362	2.64079
									771	0.00164843	0	0.00597148	0.19157	2.2095
									772	0.00171938	0	0.00555839	0.172591	1.95051
									773	0.00175529	0	0.00474806	0.155278	2.09687
									774	0.00189792	0	0.0041817	0.139308	2.22485
									775	0.001828	0	0.00345742	0.0908246	1.27078
									776	0.00196691	0	0.00340552	0.0850477	1.11579
									777	0.00181862	0	0.00374728	0.0802951	1.21668
									778	0.0017854	0	0.00469947	0.0765448	1.21388
									779	0.00237835	0	0.00663883	0.073929	0.650209
									780	0.00318779	0	0.00890043	0.0717481	0
